# Supplementary material for: Engineering the oleaginous yeast Yarrowia lipolytica to produce the aroma compound β-ionone
Source: Microb Cell Fact. 2018 Sep 1;17:136. doi: 10.1186/s12934-018-0984-x (PMC6119263; doi:10.1186/s12934-018-0984-x)
Supplement: Supplementary file 1 — Additional file 1. Small tube medium test data. This file contains the small tube medium test data labels for Fig. 2 as well as the data input for machine learning analysis. [file 12934_2018_984_MOESM1_ESM.xlsx]

## Sheet: Info
Additional File 1
This sheet contains the small vial fermentations data that was used to graph Fig. 2 in the main file and data input for the machine learning
Fig2_PlottedData sheet
Fig2_PlottedData contains the average percentage of improvement observed in the titers and mg/mg relative to each experiments control (i.e., 12 g/L glucose)
Each point has the amount of carbon and amino acid added to the vials The time of the supplemented medium addition, and the time harvested
Mldata Sheet
MLData Sheet contains the individual experimental data and catorgories that were used in the machine learning
The data is represented in a similar manner as Fig2_PlottedData sheet
The 0,1 binary input represents the lack of or medium supplementation to each point, respectively
The 0,1 binary output represents that the "background" category or high producing category, respectively

## Sheet: Fig2_PlottedData
Input																Percent Improved
Carbon Concentration (g/L)						AA Concentration (g/L)							Salts added	Time Added (hr)	Time Harvested (hr)	mg/mg yield	Titer
Acetate	Citric Acid	Ethanol	Glucose	Glycerol	Pyruvate	Glu	Ile	Leu	Lys	Met	Phe	Val	2% KCl, NaCl	Time Added (hr)	Time Harvested (hr)	Bcart/mg DCW % improve	bcart % improve
2	0	0	10	0	0	0	0	0	0	0	0	0	0	0	36	-0.456984	-0.687068
0	2	0	10	0	0	0	0	0	0	0	0	0	0	0	36	-0.0979939	-0.357481
0	0	2	10	0	0	0	0	0	0	0	0	0	0	0	36	-0.140604	-0.390485
0	0	0	10	2	0	0	0	0	0	0	0	0	0	0	36	-0.35622	-0.570321
0	0	0	10	0	2	0	0	0	0	0	0	0	0	0	36	-0.38956	-0.684967
0	0	0	10	0	0	0.5	0	0	0	0	0	0	0	0	36	-0.165494	-0.262361
0	0	0	10	0	0	0	0.5	0	0	0	0	0	0	0	36	0.148883	0.214417
0	0	0	10	0	0	0	0	0	0	0	0	0	0	0	36	-0.00910933	0.0513396
0	0	0	10	0	0	0	0	0	0	0	0	0.5	0	0	36	0.00898208	0.0660739
0	0	0	10	0	0	0	0	0	0	0.5	0	0	0	0	36	0.108528	0.0379633
0	0	0	10	0	0	0	0	0	0	0	0.5	0	0	0	36	0.155014	0.0427296
2	0	0	10	0	0	0.5	0	0	0	0	0	0	0	0	36	-0.144824	-0.170239
2	0	0	10	0	0	0	0.5	0	0	0	0	0	0	0	36	-0.322787	-0.272867
2	0	0	10	0	0	0	0	0	0	0	0	0.5	0	0	36	0.336134	0.0579251
2	0	0	10	0	0	0	0	0	0	0.5	0	0	0	0	36	-0.152633	-0.112378
2	0	0	10	0	0	0	0	0	0	0	0.5	0	0	0	36	-0.156706	-0.128214
0	2	0	10	0	0	0.5	0	0	0	0	0	0	0	0	36	-0.165152	-0.210496
0	2	0	10	0	0	0	0.5	0	0	0	0	0	0	0	36	0.10468	0.186537
0	2	0	10	0	0	0	0	0	0	0	0	0	0	0	36	0.0985862	0.364297
0	2	0	10	0	0	0	0	0	0	0	0	0.5	0	0	36	0.272759	0.349742
0	2	0	10	0	0	0	0	0	0	0.5	0	0	0	0	36	0.154167	-0.181514
0	2	0	10	0	0	0	0	0	0	0	0.5	0	0	0	36	0.26341	-0.00582967
0	0	2	10	0	0	0.5	0	0	0	0	0	0	0	0	36	-0.0726651	-0.205294
0	0	2	10	0	0	0	0.5	0	0	0	0	0	0	0	36	0.0872679	0.0156696
0	0	2	10	0	0	0	0	0	0	0	0	0	0	0	36	-0.257335	-0.114454
0	0	2	10	0	0	0	0	0	0	0	0	0.5	0	0	36	0.304045	0.257979
0	0	2	10	0	0	0	0	0	0	0.5	0	0	0	0	36	-0.0588844	-0.319428
0	0	2	10	0	0	0	0	0	0	0	0.5	0	0	0	36	0.0197088	-0.0607439
0	0	0	10	2	0	0.5	0	0	0	0	0	0	0	0	36	0.0893949	0.233789
0	0	0	10	2	0	0	0.5	0	0	0	0	0	0	0	36	0.146489	0.4526
0	0	0	10	2	0	0	0	0	0	0	0	0	0	0	36	-0.429824	0.107919
0	0	0	10	2	0	0	0	0	0	0	0	0.5	0	0	36	-0.0639886	0.0106984
0	0	0	10	2	0	0	0	0	0	0.5	0	0	0	0	36	0.119149	0.0321977
0	0	0	10	2	0	0	0	0	0	0	0.5	0	0	0	36	-0.0551522	-0.203142
0	0	0	10	0	2	0.5	0	0	0	0	0	0	0	0	36	0.152297	0.149996
0	0	0	10	0	2	0	0.5	0	0	0	0	0	0	0	36	0.128437	0.205653
0	0	0	10	0	2	0	0	0	0	0	0	0	0	0	36	-0.0186178	0.300593
0	0	0	10	0	2	0	0	0	0	0	0	0.5	0	0	36	0.0472729	-0.109534
0	0	0	10	0	2	0	0	0	0	0.5	0	0	0	0	36	-0.12325	-0.246678
0	0	0	12	0	2	0	0	0	0	0	0.5	0	0	0	36	0.0575053	-0.170777
0	0	0	10	0	0	0	0	0	0	0	0	0	0	0	36	-0.161051	-0.484298
0	0	0	10	0	0	0	0	0	0	0	0	0	0	0	36	-0.0248572	-0.0945176
0	0	0	12	0	0	0	0	0	0	0	0	0	0	0	36	0	0
2	0	0	10	0	0	0	0	0	0	0	0	0	0	18	36	0.00893106	-0.014824
0	2	0	10	0	0	0	0	0	0	0	0	0	0	18	36	0.266304	-0.158016
0	0	2	10	0	0	0	0	0	0	0	0	0	0	18	36	0.0839223	-0.181181
0	0	0	10	2	0	0	0	0	0	0	0	0	0	18	36	0.0295991	-0.103256
0	0	0	10	0	2	0	0	0	0	0	0	0	0	18	36	-0.129502	-0.185255
0	0	0	10	0	0	0.5	0	0	0	0	0	0	0	18	36	0.433096	-0.399454
0	0	0	10	0	0	0	0.5	0	0	0	0	0	0	18	36	-0.00270448	-0.437277
0	0	0	10	0	0	0	0	0	0	0	0	0	0	18	36	0.0386126	-0.296134
0	0	0	10	0	0	0	0	0	0	0	0	0.5	0	18	36	0.12224	-0.0467014
0	0	0	10	0	0	0	0	0	0	0.5	0	0	0	18	36	-0.168335	-0.459724
0	0	0	10	0	0	0	0	0	0	0	0.5	0	0	18	36	-0.154394	-0.35438
2	0	0	10	0	0	0.5	0	0	0	0	0	0	0	18	36	-0.24248	-0.914669
2	0	0	10	0	0	0	0.5	0	0	0	0	0	0	18	36	-0.323796	-0.652013
2	0	0	10	0	0	0	0	0	0	0	0	0	0	18	36	-0.362058	-0.584261
2	0	0	10	0	0	0	0	0	0	0	0	0.5	0	18	36	-0.399483	-0.662058
2	0	0	10	0	0	0	0	0	0	0.5	0	0	0	18	36	-0.268308	-0.581545
2	0	0	10	0	0	0	0	0	0	0	0.5	0	0	18	36	-0.20029	-0.17867
0	2	0	10	0	0	0.5	0	0	0	0	0	0	0	18	36	-0.0220837	-0.380799
0	2	0	10	0	0	0	0.5	0	0	0	0	0	0	18	36	0.0830957	0.0252022
0	2	0	10	0	0	0	0	0	0	0	0	0	0	18	36	-0.476835	-0.707363
0	2	0	10	0	0	0	0	0	0	0	0	0.5	0	18	36	-0.381821	-0.673948
0	2	0	10	0	0	0	0	0	0	0.5	0	0	0	18	36	-0.511855	-0.848659
0	2	0	10	0	0	0	0	0	0	0	0.5	0	0	18	36	-0.603601	-0.888429
0	0	2	10	0	0	0.5	0	0	0	0	0	0	0	18	36	-0.0789087	-0.287781
0	0	2	10	0	0	0	0.5	0	0	0	0	0	0	18	36	-0.156642	-0.508565
0	0	2	10	0	0	0	0	0	0	0	0	0	0	18	36	-0.22419	-0.355123
0	0	2	10	0	0	0	0	0	0	0	0	0.5	0	18	36	0.0571888	-0.10897
0	0	2	10	0	0	0	0	0	0	0.5	0	0	0	18	36	0.0313078	0.172289
0	0	2	10	0	0	0	0	0	0	0	0.5	0	0	18	36	0.167864	-0.179285
0	0	0	10	2	0	0.5	0	0	0	0	0	0	0	18	36	0.0552476	-0.0778614
0	0	0	10	2	0	0	0.5	0	0	0	0	0	0	18	36	-0.111879	-0.330267
0	0	0	10	2	0	0	0	0	0	0	0	0	0	18	36	-0.53816	-0.840254
0	0	0	10	2	0	0	0	0	0	0	0	0.5	0	18	36	-0.0350054	-0.286089
0	0	0	10	2	0	0	0	0	0	0.5	0	0	0	18	36	-0.379905	-0.800792
0	0	0	10	2	0	0	0	0	0	0	0.5	0	0	18	36	-0.123829	-0.282348
0	0	0	10	0	2	0.5	0	0	0	0	0	0	0	18	36	-0.0236019	-0.232226
0	0	0	10	0	2	0	0.5	0	0	0	0	0	0	18	36	-0.0671293	-0.391664
0	0	0	10	0	2	0	0	0	0	0	0	0	2	18	36	0.0858262	-0.0152853
0	0	0	10	0	2	0	0	0	0	0	0	0.5	2	18	36	0.215985	-0.382798
0	0	0	12	0	2	0	0	0	0	0.5	0	0	0	18	36	-0.0143482	0.0352471
0	0	0	10	0	2	0	0	0	0	0	0.5	0	0	18	36	0.0581746	-0.0308139
0	0	0	12	0	0	0	0	0	0	0	0	0	0	18	36	-0.161051	-0.484298
0	0	0	10	0	0	0	0	0	0	0	0	0	0	18	36	-0.0248572	-0.0945176
0	0	0	10	0	0	0	0	0	0	0	0	0	0	18	38	0	0
2	0	0	10	0	0	0	0	0	0	0	0	0	0	0	38	-0.00782506	0.0373241
2	0	0	10	0	0	0	0	0.5	0	0	0	0	0	0	38	-0.218083	-0.29798
2	0	0	10	0	0	0	0.5	0	0	0	0	0	0	0	38	-0.543846	-0.708164
2	0	0	10	0	0	0	0	0	0	0	0	0	0	0	38	-0.568097	-0.602368
0	2	0	10	0	0	0	0	0	0	0	0	0	0	0	38	-0.0610197	-0.172214
0	2	0	10	0	0	0	0	0.5	0	0	0	0	0	0	38	-0.32657	-0.473472
0	2	0	10	0	0	0	0.5	0	0	0	0	0	0	0	38	-0.254301	-0.262477
0	2	0	10	0	0	0	0	0	0	0	0	0	0	0	38	0.0257242	-0.0560523
0	2	0	10	0	0	0	0	0	0	0	0	0.5	0	0	38	-0.120648	-0.291505
0	2	0	10	0	0	0	0	0	0	0.5	0	0	0	0	38	-0.0221521	-0.0647458
0	0	2	10	0	0	0	0	0	0	0	0	0	0	0	38	-0.0226356	-0.218894
0	0	2	10	0	0	0	0	0.5	0	0	0	0	0	0	38	0.108207	-0.0312138
0	0	2	10	0	0	0	0.5	0	0	0	0	0	0	0	38	-0.406478	-0.715168
0	0	2	10	0	0	0	0	0	0	0	0	0	0	0	38	-0.324808	-0.225087
0	0	2	10	0	0	0	0	0	0	0	0	0.5	0	0	38	-0.109294	-0.322636
0	0	2	10	0	0	0	0	0	0	0.5	0	0	0	0	38	-0.318642	-0.535287
0	0	0	10	2	0	0	0	0	0	0	0	0	0	0	38	-0.0513765	-0.178308
0	0	0	10	2	0	0	0	0.5	0	0	0	0	0	0	38	-0.0248154	-0.104189
0	0	0	10	2	0	0	0.5	0	0	0	0	0	0	0	38	0.0344074	0.0926312
0	0	0	10	2	0	0	0	0	0	0	0	0	0	0	38	-0.201385	0.189998
0	0	0	10	2	0	0	0	0	0	0	0	0.5	0	0	38	0.0148172	0.0248054
0	0	0	10	2	0	0	0	0	0	0.5	0	0	0	0	38	0.0131958	-0.0472264
0	0	0	10	2	0	0.5	0	0	0	0	0	0	0	0	38	-0.0645689	0.0623944
0	0	0	12	0	0	0	0	0	0	0	0	0	0	0	38	0	0
0	0	0	10	0	0	0	0	0.5	0	0	0	0	0	0	38	0.0244915	-0.00986918
0	0	0	10	0	0	0	0.5	0	0	0	0	0	0	0	38	0.0215622	-0.0098195
0	0	0	10	0	0	0	0	0	0	0	0	0	0	0	38	-0.161078	-0.1641
0	0	0	10	0	0	0	0	0	0	0.5	0	0	0	0	38	-0.160799	-0.379864
0	0	0	10	0	0	0	0	0	0	0	0	0.5	0	0	38	-0.264023	-0.534757
0	0	0	10	2	0	0.5	0	0	0	0	0	0	0	18	38	-0.573568	-0.62608
0	0	0	10	0	0	0	0.5	0	0	0	0	0	0	18	38	-0.554246	-0.64769
0	2	0	10	0	0	0	0.5	0	0	0	0	0	0	18	38	-0.212407	-0.294519
0	0	2	10	0	0	0	0.5	0	0	0	0	0	0	18	38	-0.603341	-0.812601
0	0	0	10	2	0	0	0.5	0	0	0	0	0	0	18	38	-0.0911709	-0.133896
2	0	0	10	0	0	0	0.5	0	0	0	0	0	0	18	38	-0.685469	-0.890098
0	0	0	10	0	0	0	0	0.5	0	0	0	0	0	18	38	-0.546534	-0.53532
0	2	0	10	0	0	0	0	0.5	0	0	0	0	0	18	38	0.0457001	-0.148419
0	0	2	10	0	0	0	0	0.5	0	0	0	0	0	18	38	-0.60804	-0.852426
0	0	0	10	2	0	0	0	0.5	0	0	0	0	2	18	38	-0.138382	-0.20303
2	0	0	10	0	0	0	0	0.5	0	0	0	0	2	18	38	-0.632409	-0.87132
0	0	0	12	0	0	0	0	0	0	0	0	0	0	18	38	-0.588927	-0.869366
0	2	0	10	0	0	0	0	0	0	0	0	0	0	18	38	-0.285078	-0.297019
0	0	2	10	0	0	0	0	0	0	0	0	0	0	18	38	-0.609559	-0.837672
0	0	0	10	2	0	0	0	0	0	0	0	0	0	18	38	-0.200158	-0.272644
2	0	0	10	0	0	0	0	0	0	0	0	0	0	18	38	-0.714397	-0.867528
0	0	0	10	0	0	0	0	0	0	0.5	0	0	0	18	38	-0.543163	-0.789319
0	2	0	10	0	0	0	0	0	0	0.5	0	0	0	18	38	-0.239027	-0.454231
0	0	2	10	0	0	0	0	0	0	0.5	0	0	0	18	38	-0.531818	-0.586687
0	0	0	10	2	0	0	0	0	0	0.5	0	0	0	18	38	-0.376684	-0.491042
0	0	0	10	0	0	0	0	0	0	0	0	0.5	0	18	38	-0.448165	-0.555787
0	2	0	10	0	0	0	0	0	0	0	0	0.5	0	18	38	-0.313667	-0.439079
0	0	2	10	0	0	0	0	0	0	0	0	0.5	0	18	38	-0.508954	-0.672495
0	0	0	10	2	0	0	0	0	0	0	0	0.5	0	18	38	-0.240705	-0.329889
0	2	0	10	0	0	0	0	0	0	0	0	0	0	18	38	-0.234547	-0.359232
0	0	2	10	0	0	0	0	0	0	0	0	0	0	18	38	-0.206249	-0.358188
0	0	0	10	2	0	0	0	0	0	0	0	0	0	18	38	-0.138587	-0.310151
2	0	0	10	0	0	0	0	0	0	0	0	0	0	18	38	0.478901	-0.331346
2	0	0	10	0	0	0	0	0	0	0	0	0	0	0	109	0.0318713	0.152131
2	0	0	10	0	0	0	0	0.5	0	0	0	0	0	0	109	0.0916386	-0.041965
2	0	0	10	0	0	0	0.5	0	0	0	0	0	0	0	109	-0.0561222	-0.0440865
2	0	0	10	0	0	0	0	0	0	0	0	0	0	0	109	-0.257433	-0.0231371
0	2	0	10	0	0	0	0	0	0	0	0	0	0	0	109	0.20404	0.195025
0	2	0	10	0	0	0	0	0.5	0	0	0	0	0	0	109	0.213987	0.0022872
0	2	0	10	0	0	0	0.5	0	0	0	0	0	0	0	109	0.309904	0.383088
0	2	0	10	0	0	0	0	0	0	0	0	0	0	0	109	0.108167	-0.0502022
0	2	0	10	0	0	0	0	0	0	0	0	0.5	0	0	109	0.136372	0.204687
0	2	0	10	0	0	0	0	0	0	0.5	0	0	0	0	109	0.0712142	-0.0283413
0	0	2	10	0	0	0	0	0	0	0	0	0	0	0	109	0.2101	0.066196
0	0	2	10	0	0	0	0	0.5	0	0	0	0	0	0	109	0.445424	0.0889022
0	0	2	10	0	0	0	0.5	0	0	0	0	0	0	0	109	0.150004	0.0857531
0	0	2	10	0	0	0	0	0	0	0	0	0	0	0	109	-0.00144421	0.42497
0	0	2	10	0	0	0	0	0	0	0	0	0.5	0	0	109	0.261814	0.166899
0	0	2	10	0	0	0	0	0	0	0.5	0	0	0	0	109	0.494708	0.143679
0	0	0	10	2	0	0	0	0	0	0	0	0	0	0	109	0.285897	0.154617
0	0	0	10	2	0	0	0	0.5	0	0	0	0	0	0	109	0.332535	0.463107
0	0	0	10	2	0	0	0.5	0	0	0	0	0	0	0	109	0.413671	0.395949
0	0	0	10	2	0	0	0	0	0	0	0	0	0	0	109	-0.129568	0.150242
0	0	0	10	2	0	0	0	0	0	0	0	0.5	0	0	109	0.719256	0.871221
0	0	0	10	2	0	0	0	0	0	0.5	0	0	0	0	109	0.524449	0.113067
0	0	0	10	2	0	0.5	0	0	0	0	0	0	0	0	109	0.579304	0.549539
0	0	0	12	0	0	0	0	0	0	0	0	0	0	0	109	0	0
0	0	0	10	0	0	0	0	0.5	0	0	0	0	0	0	109	0.0405051	-0.0104581
0	0	0	10	0	0	0	0.5	0	0	0	0	0	0	0	109	0.158047	-0.0362139
0	0	0	10	0	0	0	0	0	0	0	0	0	0	0	109	0.273955	-0.014817
0	0	0	10	0	0	0	0	0	0	0.5	0	0	0	0	109	-0.0761002	-0.298893
0	0	0	10	0	0	0	0	0	0	0	0	0.5	0	0	109	0.110054	-0.00916536
2	0	0	10	0	0	0	0	0	0	0	0	0	0	18	109	0.128585	0.0416832
2	0	0	10	0	0	0	0	0.5	0	0	0	0	0	18	109	-0.552493	-0.574118
2	0	0	10	0	0	0	0.5	0	0	0	0	0	0	18	109	-0.54043	-0.518579
2	0	0	10	0	0	0	0	0	0	0	0	0	0	18	109	-0.543043	-0.552075
0	2	0	10	0	0	0	0	0	0	0	0	0	0	18	109	0.00761231	-0.0453626
0	2	0	10	0	0	0	0	0.5	0	0	0	0	0	18	109	-0.0298649	0.0840957
0	2	0	10	0	0	0	0.5	0	0	0	0	0	0	18	109	-0.0794312	-0.0640745
0	2	0	10	0	0	0	0	0	0	0	0	0	0	18	109	0.278766	0.232382
0	2	0	10	0	0	0	0	0	0	0	0	0.5	0	18	109	0.59416	0.0520419
0	2	0	10	0	0	0	0	0	0	0.5	0	0	0	18	109	-0.194302	-0.357846
0	0	2	10	0	0	0	0	0	0	0	0	0	0	18	109	0.376513	0.124271
0	0	2	10	0	0	0	0	0.5	0	0	0	0	0	18	109	-0.0029456	-0.133618
0	0	2	10	0	0	0	0.5	0	0	0	0	0	0	18	109	-0.0861979	-0.296904
0	0	2	10	0	0	0	0	0	0	0	0	0	0	18	109	0.0487355	0.21183
0	0	2	10	0	0	0	0	0	0	0	0	0.5	0	18	109	0.274066	-0.0364459
0	0	2	10	0	0	0	0	0	0	0.5	0	0	0	18	109	0.173862	-0.167379
0	0	0	10	2	0	0	0	0	0	0	0	0	0	18	109	0.0399325	-0.000265189
0	0	0	10	2	0	0	0	0.5	0	0	0	0	0	18	109	0.127295	0.163037
0	0	0	10	2	0	0	0.5	0	0	0	0	0	0	18	109	0.196261	0.014701
0	0	0	10	2	0	0	0	0	0	0	0	0	0	18	109	0.100155	-0.126276
0	0	0	10	2	0	0	0	0	0	0	0	0.5	0	18	109	0.232422	-0.0591521
0	0	0	10	2	0	0	0	0	0	0.5	0	0	0	18	109	0.230494	-0.311688
0	0	0	10	2	0	0.5	0	0	0	0	0	0	0	18	109	-0.274445	-0.343477
0	0	0	10	0	0	0	0	0.5	0	0	0	0	0	18	109	-0.025228	-0.0940235
0	0	0	10	0	0	0	0.5	0	0	0	0	0	0	18	109	-0.283096	-0.389519
0	0	0	10	0	0	0	0	0	0	0	0	0	0	18	109	-0.221073	-0.257989
0	0	0	10	0	0	0	0	0	0	0.5	0	0	0	18	109	-0.156759	-0.370509
0	0	0	10	0	0	0	0	0	0	0	0	0.5	0	18	109	-0.0273444	-0.136436
0	2	0	10	0	0	0	0.5	0	0	0	0	0	0	0	38	-0.0331759	0.0594481
0	2	0	10	0	0	0	0	0	0	0	0	0.5	0	0	38	-0.00753828	0.0909018
0	2	0	10	0	0	0	0	0.5	0	0	0	0	0	0	38	-0.244935	-0.42217
0	2	0	10	0	0	0	0.25	0	0	0	0	0.25	0	0	38	0.102073	-0.273108
0	2	0	10	0	0	0	0	0.25	0	0	0	0.25	0	0	38	0.191799	0.255249
0	0	2	10	0	0	0	0	0.5	0	0	0	0	0	0	38	-0.282713	-0.0279141
0	0	2	10	0	0	0	0	0	0	0.5	0	0	0	0	38	0.300104	-0.107875
0	0	2	10	0	0	0	0	0	0	0	0	0.5	0	0	38	0.178477	0.0889711
0	0	2	12	0	0	0.5	0	0	0	0	0	0	0	0	38	0.290052	0.27713
0	0	2	10	0	0	0	0	0.25	0	0.25	0	0	0	0	38	0.17946	-0.0107795
0	0	2	10	0	0	0	0	0	0	0.25	0	0.25	0	0	38	0.158119	0.0159279
0	0	2	10	0	0	0	0	0.25	0	0	0	0.25	0	0	38	0.153104	0.810152
0	1	1	10	0	0	0	0	0	0	0	0	0	0	0	38	0.23865	0.0900973
0	0	0	10	2	0	0	0.5	0	0	0	0	0	0	0	38	0.286073	1.55852
0	0	0	10	2	0	0	0	0.5	0	0	0	0	0	0	38	0.285608	1.07892
0	0	0	10	2	0	0	0	0	0	0.5	0	0	0	0	38	0.0150906	0.631164
0	0	0	10	2	0	0.5	0	0	0	0	0	0	0	0	38	0.014331	0.665272
0	0	0	10	2	0	0	0	0	0	0	0	0.5	0	0	38	0.204337	0.778457
0	0	0	10	2	0	0.25	0	0	0	0	0	0.25	0	0	38	0.184056	0.650631
0	0	0	10	2	0	0	0	0	0	0.25	0	0.25	0	0	38	-0.0655092	0.611455
0	0	0	10	2	0	0	0.25	0	0	0	0	0.25	0	0	38	0.372983	1.27126
0	0	1	10	1	0	0	0	0	0	0	0	0	0	0	38	0.205232	0.757059
0	0	1	10	1	0	0	0	0	0	0	0	0.5	0	0	38	0.640418	1.28059
0	0	1	10	1	0	0	0	0	0	0.25	0	0	0	0	38	0.307948	1.0794
0	0	1	10	1	0	0.25	0	0	0	0	0	0	0	0	38	0.157417	0.932266
0	1	0	10	1	0	0	0	0	0	0	0	0	0	0	38	0.301314	1.1707
0	0	0	12	0	0	0	0	0	0	0	0	0	0	0	38	0	0
0	2	0	10	0	0	0	0.5	0	0	0	0	0	0	24	38	1.51078	0.907811
0	2	0	10	0	0	0	0	0	0	0	0	0.5	0	24	38	0.524503	0.615719
0	2	0	10	0	0	0	0	0.5	0	0	0	0	0	24	38	0.958771	1.18156
0	2	0	10	0	0	0	0.25	0	0	0	0	0.25	0	24	38	0.792748	1.00121
0	2	0	10	0	0	0	0	0.25	0	0	0	0.25	0	24	38	0.625533	0.910948
0	0	2	10	0	0	0	0.5	0	0	0	0	0	0	24	38	1.76557	0.975706
0	0	2	10	0	0	0	0	0.5	0	0	0	0	0	24	38	0.929314	1.35468
0	0	2	10	0	0	0	0	0	0	0.5	0	0	0	24	38	1.06024	0.735098
0	0	2	10	0	0	0	0	0	0	0	0	0.5	0	24	38	1.07814	0.910064
0	0	2	10	0	0	0.5	0	0	0	0	0	0	0	24	38	1.12848	0.618936
0	0	2	10	0	0	0	0	0.25	0	0.25	0	0	0	24	38	1.16148	0.670823
0	0	2	12	0	0	0	0	0	0	0.25	0	0.25	0	24	38	1.01521	0.603652
0	0	2	10	0	0	0	0	0.25	0	0	0	0.25	0	24	38	1.19646	1.29048
0	1	1	10	0	0	0	0	0	0	0	0	0	0	24	38	1.14569	0.976752
0	0	0	10	2	0	0	0.5	0	0	0	0	0	0	24	38	1.72247	1.14834
0	0	0	10	2	0	0	0	0.5	0	0	0	0	0	24	38	1.72251	1.19073
0	0	0	10	2	0	0	0	0	0	0.5	0	0	0	24	38	1.15367	0.941356
0	0	0	10	2	0	0.5	0	0	0	0	0	0	0	24	38	1.57151	1.04827
0	0	0	10	2	0	0	0	0	0	0	0	0.5	0	24	38	1.00097	1.03194
0	0	0	10	2	0	0.25	0	0	0	0	0	0.25	0	24	38	0.940297	1.1193
0	0	0	10	2	0	0	0	0	0	0.25	0	0.25	0	24	38	0.941253	1.03612
0	0	0	10	2	0	0	0.25	0	0	0	0	0.25	0	24	38	1.25672	1.06275
0	0	1	10	1	0	0	0	0	0	0	0	0	0	24	38	1.37027	1.10265
0	0	1	10	1	0	0	0	0	0	0	0	0.5	0	24	38	1.55411	0.864693
0	0	1	10	1	0	0	0	0	0	0.25	0	0	0	24	38	1.61467	0.980774
0	0	1	10	1	0	0.25	0	0	0	0	0	0	0	24	38	1.16607	1.00249
0	1	0	10	1	0	0	0	0	0	0	0	0	0	24	38	0.727703	1.09163
0	0	0	12	0	0	0	0	0	0	0	0	0	0	24	38	0	0

## Sheet: MLData
Input
Carbon Concentration (g/L)						AA Concentration (g/L)							Salts	Binary Output
Acetate	Citric Acid	Ethanol	Glucose	Glycerol	Pyruvate	Glu	Ile	Leu	Lys	Met	Phe	Val	2% KCl, NaCl	Bcart mg/mg percent	Bcart Titer
1	0	0	1	0	0	0	0	0	0	0	0	0	0	0	0
0	1	0	1	0	0	0	0	0	0	0	0	0	0	0	0
0	0	1	1	0	0	0	0	0	0	0	0	0	0	0	0
0	0	0	1	1	0	0	0	0	0	0	0	0	0	0	0
0	0	0	1	0	1	0	0	0	0	0	0	0	0	0	0
0	0	0	1	0	0	1	0	0	0	0	0	0	0	0	0
0	0	0	1	0	0	0	1	0	0	0	0	0	0	0	0
0	0	0	1	0	0	0	0	0	1	0	0	0	0	0	0
0	0	0	1	0	0	0	0	0	0	0	0	1	0	0	0
0	0	0	1	0	0	0	0	0	0	1	0	0	0	0	0
1	0	0	1	0	0	1	0	0	0	0	0	0	0	0	0
1	0	0	1	0	0	0	1	0	0	0	0	0	0	0	0
1	0	0	1	0	0	0	0	0	1	0	0	0	0	0	0
1	0	0	1	0	0	0	0	0	0	0	0	1	0	1	0
1	0	0	1	0	0	0	0	0	0	1	0	0	0	0	0
1	0	0	1	0	0	0	0	0	0	0	1	0	0	0	0
0	1	0	1	0	0	1	0	0	0	0	0	0	0	0	0
0	1	0	1	0	0	0	1	0	0	0	0	0	0	0	0
0	1	0	1	0	0	0	0	0	1	0	0	0	0	0	0
0	1	0	1	0	0	0	0	0	0	0	0	1	0	0	0
0	1	0	1	0	0	0	0	0	0	1	0	0	0	0	0
0	1	0	1	0	0	0	0	0	0	0	1	0	0	0	0
0	0	1	1	0	0	1	0	0	0	0	0	0	0	0	0
0	0	1	1	0	0	0	1	0	0	0	0	0	0	0	0
0	0	1	1	0	0	0	0	0	1	0	0	0	0	0	0
0	0	1	1	0	0	0	0	0	0	0	0	1	0	0	0
0	0	1	1	0	0	0	0	0	0	1	0	0	0	0	0
0	0	1	1	0	0	0	0	0	0	0	1	0	0	0	0
0	0	0	1	1	0	1	0	0	0	0	0	0	0	0	0
0	0	0	1	1	0	0	1	0	0	0	0	0	0	0	0
0	0	0	1	1	0	0	0	0	1	0	0	0	0	0	0
0	0	0	1	1	0	0	0	0	0	0	0	1	0	0	0
0	0	0	1	1	0	0	0	0	0	1	0	0	0	0	0
0	0	0	1	1	0	0	0	0	0	0	1	0	0	0	0
0	0	0	1	0	1	1	0	0	0	0	0	0	0	0	0
0	0	0	1	0	1	0	1	0	0	0	0	0	0	1	0
0	0	0	1	0	1	0	0	0	1	0	0	0	0	0	0
0	0	0	1	0	1	0	0	0	0	0	0	1	0	0	0
0	0	0	1	0	1	0	0	0	0	1	0	0	0	0	0
0	0	0	1	0	1	0	0	0	0	0	1	0	0	0	0
0	0	0	1	0	0	0	0	0	0	0	0	0	0	0	0
1	0	0	1	0	0	0	0	0	0	0	0	0	0	1	1
0	1	0	1	0	0	0	0	0	0	0	0	0	0	0	1
0	0	1	1	0	0	0	0	0	0	0	0	0	0	0	1
0	0	0	1	1	0	0	0	0	0	0	0	0	0	0	1
0	0	0	1	0	1	0	0	0	0	0	0	0	0	0	1
0	0	0	1	0	0	1	0	0	0	0	0	0	0	0	0
0	0	0	1	0	0	0	1	0	0	0	0	0	0	0	0
0	0	0	1	0	0	0	0	0	1	0	0	0	0	0	0
0	0	0	1	0	0	0	0	0	0	0	0	1	0	0	0
0	0	0	1	0	0	0	0	0	0	1	0	0	0	0	0
0	0	0	1	0	0	0	0	0	0	0	1	0	0	0	0
1	0	0	1	0	0	1	0	0	0	0	0	0	0	0	0
1	0	0	1	0	0	0	1	0	0	0	0	0	0	0	0
1	0	0	1	0	0	0	0	0	1	0	0	0	0	0	0
1	0	0	1	0	0	0	0	0	0	0	0	1	0	0	0
1	0	0	1	0	0	0	0	0	0	1	0	0	0	0	0
1	0	0	1	0	0	0	0	0	0	0	1	0	0	0	0
0	1	0	1	0	0	1	0	0	0	0	0	0	0	0	0
0	1	0	1	0	0	0	1	0	0	0	0	0	0	0	0
0	1	0	1	0	0	0	0	0	1	0	0	0	0	0	1
0	1	0	1	0	0	0	0	0	0	0	0	1	0	0	0
0	1	0	1	0	0	0	0	0	0	1	0	0	0	0	0
0	1	0	1	0	0	0	0	0	0	0	1	0	0	1	0
0	0	1	1	0	0	1	0	0	0	0	0	0	0	0	0
0	0	1	1	0	0	0	1	0	0	0	0	0	0	0	1
0	0	1	1	0	0	0	0	0	1	0	0	0	0	0	0
0	0	1	1	0	0	0	0	0	0	0	0	1	0	1	1
0	0	1	1	0	0	0	0	0	0	1	0	0	0	0	0
0	0	1	1	0	0	0	0	0	0	0	1	0	0	0	0
0	0	0	1	1	0	1	0	0	0	0	0	0	0	0	1
0	0	0	1	1	0	0	1	0	0	0	0	0	0	0	0
0	0	0	1	1	0	0	0	0	1	0	0	0	0	0	0
0	0	0	1	1	0	0	0	0	0	0	0	1	0	0	1
0	0	0	1	1	0	0	0	0	0	1	0	0	0	0	0
0	0	0	1	1	0	0	0	0	0	0	1	0	0	0	0
0	0	0	1	0	1	1	0	0	0	0	0	0	0	0	0
0	0	0	1	0	1	0	1	0	0	0	0	0	0	0	0
0	0	0	1	0	1	0	0	0	1	0	0	0	0	0	1
0	0	0	1	0	1	0	0	0	0	0	0	1	0	0	0
0	0	0	1	0	1	0	0	0	0	1	0	0	0	0	0
0	0	0	1	0	1	0	0	0	0	0	1	0	0	0	0
0	0	0	1	0	0	0	0	0	0	0	0	0	1	0	0
0	0	0	1	0	0	0	0	0	0	0	0	0	1	0	0
0	0	0	1	0	0	0	0	0	0	0	0	0	0	0	0
0	0	0	1	0	0	0	0	0	0	0	1	0	0	0	0
0	0	0	1	0	0	0	0	0	0	0	0	0	0	0	0
1	0	0	1	0	0	0	0	0	0	0	0	0	0	0	0
0	1	0	1	0	0	0	0	0	0	0	0	0	0	1	0
0	0	1	1	0	0	0	0	0	0	0	0	0	0	0	0
0	0	0	1	1	0	0	0	0	0	0	0	0	0	0	0
0	0	0	1	0	1	0	0	0	0	0	0	0	0	0	0
0	0	0	1	0	0	1	0	0	0	0	0	0	0	1	0
0	0	0	1	0	0	0	1	0	0	0	0	0	0	0	0
0	0	0	1	0	0	0	0	0	1	0	0	0	0	0	0
0	0	0	1	0	0	0	0	0	0	0	0	1	0	0	0
0	0	0	1	0	0	0	0	0	0	1	0	0	0	0	0
0	0	0	1	0	0	0	0	0	0	0	1	0	0	0	0
1	0	0	1	0	0	1	0	0	0	0	0	0	0	0	0
1	0	0	1	0	0	0	1	0	0	0	0	0	0	0	0
1	0	0	1	0	0	0	0	0	1	0	0	0	0	0	0
1	0	0	1	0	0	0	0	0	0	0	0	1	0	0	0
1	0	0	1	0	0	0	0	0	0	1	0	0	0	0	0
1	0	0	1	0	0	0	0	0	0	0	1	0	0	0	0
0	1	0	1	0	0	1	0	0	0	0	0	0	0	0	0
0	1	0	1	0	0	0	1	0	0	0	0	0	0	0	0
0	1	0	1	0	0	0	0	0	1	0	0	0	0	0	0
0	1	0	1	0	0	0	0	0	0	0	0	1	0	0	0
0	1	0	1	0	0	0	0	0	0	1	0	0	0	0	0
0	1	0	1	0	0	0	0	0	0	0	1	0	0	0	0
0	0	1	1	0	0	1	0	0	0	0	0	0	0	0	0
0	0	1	1	0	0	0	1	0	0	0	0	0	0	0	0
0	0	1	1	0	0	0	0	0	1	0	0	0	0	0	0
0	0	1	1	0	0	0	0	0	0	0	0	1	0	0	0
0	0	1	1	0	0	0	0	0	0	1	0	0	0	0	1
0	0	1	1	0	0	0	0	0	0	0	1	0	0	0	0
0	0	0	1	1	0	1	0	0	0	0	0	0	0	0	0
0	0	0	1	1	0	0	1	0	0	0	0	0	0	0	0
0	0	0	1	1	0	0	0	0	1	0	0	0	0	0	0
0	0	0	1	1	0	0	0	0	0	0	0	1	0	0	0
0	0	0	1	1	0	0	0	0	0	1	0	0	0	0	0
0	0	0	1	1	0	0	0	0	0	0	1	0	0	0	0
0	0	0	1	0	1	1	0	0	0	0	0	0	0	0	0
0	0	0	1	0	1	0	1	0	0	0	0	0	0	0	0
0	0	0	1	0	1	0	0	0	1	0	0	0	0	0	0
0	0	0	1	0	1	0	0	0	0	0	0	1	0	0	0
0	0	0	1	0	1	0	0	0	0	1	0	0	0	0	0
0	0	0	1	0	1	0	0	0	0	0	1	0	0	0	0
0	0	0	1	0	0	0	0	0	0	0	0	0	1	0	0
0	0	0	1	0	0	0	0	0	0	0	0	0	1	0	1
0	0	0	1	0	0	0	0	0	0	0	0	0	0	0	0
0	0	0	1	0	0	0	0	0	0	0	1	0	0	0	0
0	1	0	1	0	0	0	0	0	0	0	0	0	0	1	1
0	0	1	1	0	0	0	0	0	0	0	0	0	0	1	1
0	0	0	1	1	0	0	0	0	0	0	0	0	0	1	1
1	0	0	1	0	0	0	0	0	0	0	0	0	0	0	0
0	0	0	1	0	0	0	0	1	0	0	0	0	0	0	0
0	0	0	1	0	0	0	1	0	0	0	0	0	0	1	0
0	0	0	1	0	0	0	0	0	1	0	0	0	0	0	0
0	0	0	1	0	0	0	0	0	0	1	0	0	0	0	0
0	0	0	1	0	0	0	0	0	0	0	0	1	0	0	0
0	1	0	1	0	0	0	0	1	0	0	0	0	0	0	0
0	1	0	1	0	0	0	1	0	0	0	0	0	0	1	1
0	1	0	1	0	0	0	0	0	1	0	0	0	0	1	1
0	1	0	1	0	0	0	0	0	0	1	0	0	0	1	1
0	1	0	1	0	0	0	0	0	0	0	0	1	0	0	0
0	0	1	1	0	0	0	0	1	0	0	0	0	0	0	0
0	0	1	1	0	0	0	1	0	0	0	0	0	0	0	0
0	0	1	1	0	0	0	0	0	1	0	0	0	0	0	0
0	0	1	1	0	0	0	0	0	0	1	0	0	0	0	0
0	0	1	1	0	0	0	0	0	0	0	0	1	0	0	0
0	0	0	1	1	0	0	0	1	0	0	0	0	0	0	0
0	0	0	1	1	0	0	1	0	0	0	0	0	0	1	1
0	0	0	1	1	0	0	0	0	1	0	0	0	0	0	1
0	0	0	1	1	0	0	0	0	0	1	0	0	0	1	0
0	0	0	1	1	0	0	0	0	0	0	0	1	0	0	0
1	0	0	1	0	0	0	0	1	0	0	0	0	0	0	0
1	0	0	1	0	0	0	1	0	0	0	0	0	0	0	0
1	0	0	1	0	0	0	0	0	1	0	0	0	0	0	0
0	1	0	1	0	0	0	0	0	0	0	0	0	0	0	0
0	0	1	1	0	0	0	0	0	0	0	0	0	0	0	0
0	0	0	1	1	0	0	0	0	0	0	0	0	0	0	0
1	0	0	1	0	0	0	0	0	0	0	0	0	0	0	0
0	0	0	1	0	0	0	0	1	0	0	0	0	0	0	0
0	0	0	1	0	0	0	1	0	0	0	0	0	0	0	0
0	0	0	1	0	0	0	0	0	1	0	0	0	0	0	0
0	0	0	1	0	0	0	0	0	0	1	0	0	0	0	0
0	0	0	1	0	0	0	0	0	0	0	0	1	0	0	0
0	1	0	1	0	0	0	0	1	0	0	0	0	0	0	0
0	1	0	1	0	0	0	1	0	0	0	0	0	0	0	0
0	1	0	1	0	0	0	0	0	1	0	0	0	0	0	0
0	1	0	1	0	0	0	0	0	0	1	0	0	0	0	0
0	1	0	1	0	0	0	0	0	0	0	0	1	0	1	0
0	0	1	1	0	0	0	0	1	0	0	0	0	0	1	0
0	0	1	1	0	0	0	1	0	0	0	0	0	0	0	0
0	0	1	1	0	0	0	0	0	1	0	0	0	0	0	0
0	0	1	1	0	0	0	0	0	0	1	0	0	0	0	0
0	0	1	1	0	0	0	0	0	0	0	0	1	0	0	0
0	0	0	1	1	0	0	0	1	0	0	0	0	0	0	0
0	0	0	1	1	0	0	1	0	0	0	0	0	0	0	0
0	0	0	1	1	0	0	0	0	1	0	0	0	0	0	0
0	0	0	1	1	0	0	0	0	0	1	0	0	0	0	0
0	0	0	1	1	0	0	0	0	0	0	0	1	0	0	0
1	0	0	1	0	0	0	0	1	0	0	0	0	0	0	0
1	0	0	1	0	0	0	1	0	0	0	0	0	0	0	0
1	0	0	1	0	0	0	0	0	1	0	0	0	0	0	0
0	1	0	1	0	0	0	0	0	0	0	0	0	0	1	1
0	0	1	1	0	0	0	0	0	0	0	0	0	0	0	0
0	0	0	1	1	0	0	0	0	0	0	0	0	0	1	0
1	0	0	1	0	0	0	0	0	0	0	0	0	0	1	0
0	0	0	1	0	0	0	0	1	0	0	0	0	0	0	0
0	0	0	1	0	0	0	1	0	0	0	0	0	0	0	0
0	0	0	1	0	0	0	0	0	1	0	0	0	0	0	0
0	0	0	1	0	0	0	0	0	0	1	0	0	0	0	0
0	0	0	1	0	0	0	0	0	0	0	0	1	0	0	0
0	1	0	1	0	0	0	0	1	0	0	0	0	0	0	0
0	1	0	1	0	0	0	1	0	0	0	0	0	0	0	0
0	1	0	1	0	0	0	0	0	1	0	0	0	0	0	0
0	1	0	1	0	0	0	0	0	0	1	0	0	0	0	0
0	1	0	1	0	0	0	0	0	0	0	0	1	0	1	0
0	0	1	1	0	0	0	0	1	0	0	0	0	0	0	0
0	0	1	1	0	0	0	1	0	0	0	0	0	0	0	0
0	0	1	1	0	0	0	0	0	1	0	0	0	0	0	0
0	0	1	1	0	0	0	0	0	0	1	0	0	0	0	0
0	0	1	1	0	0	0	0	0	0	0	0	1	0	0	0
0	0	0	1	1	0	0	0	1	0	0	0	0	0	1	0
0	0	0	1	1	0	0	1	0	0	0	0	0	0	0	1
0	0	0	1	1	0	0	0	0	1	0	0	0	0	0	0
0	0	0	1	1	0	0	0	0	0	1	0	0	0	0	0
0	0	0	1	1	0	0	0	0	0	0	0	1	0	0	0
1	0	0	1	0	0	0	0	1	0	0	0	0	0	0	0
1	0	0	1	0	0	0	1	0	0	0	0	0	0	0	0
1	0	0	1	0	0	0	0	0	1	0	0	0	0	0	0
0	0	0	1	0	0	0	0	0	0	0	0	0	0	0	0
0	0	0	1	1	0	1	0	0	0	0	0	0	0	0	1
0	0	0	1	1	0	1	0	0	0	0	0	0	0	0	0
0	1	0	1	0	0	0	0	0	0	0	0	0	0	0	0
0	0	1	1	0	0	0	0	0	0	0	0	0	0	0	0
0	0	0	1	1	0	0	0	0	0	0	0	0	0	0	0
1	0	0	1	0	0	0	0	0	0	0	0	0	0	0	0
0	0	0	1	0	0	0	0	1	0	0	0	0	0	0	1
0	0	0	1	0	0	0	1	0	0	0	0	0	0	0	0
0	0	0	1	0	0	0	0	0	1	0	0	0	0	0	0
0	0	0	1	0	0	0	0	0	0	1	0	0	0	0	0
0	0	0	1	0	0	0	0	0	0	0	0	1	0	0	0
0	1	0	1	0	0	0	0	1	0	0	0	0	0	1	1
0	1	0	1	0	0	0	1	0	0	0	0	0	0	0	0
0	1	0	1	0	0	0	0	0	1	0	0	0	0	0	0
0	1	0	1	0	0	0	0	0	0	1	0	0	0	0	0
0	1	0	1	0	0	0	0	0	0	0	0	1	0	0	0
0	0	1	1	0	0	0	0	1	0	0	0	0	0	0	0
0	0	1	1	0	0	0	1	0	0	0	0	0	0	0	0
0	0	1	1	0	0	0	0	0	1	0	0	0	0	0	0
0	0	1	1	0	0	0	0	0	0	1	0	0	0	0	0
0	0	1	1	0	0	0	0	0	0	0	0	1	0	0	0
0	0	0	1	1	0	0	0	1	0	0	0	0	0	0	1
0	0	0	1	1	0	0	1	0	0	0	0	0	0	1	1
0	0	0	1	1	0	0	0	0	1	0	0	0	0	0	0
0	0	0	1	1	0	0	0	0	0	1	0	0	0	0	0
0	0	0	1	1	0	0	0	0	0	0	0	1	0	0	0
1	0	0	1	0	0	0	0	1	0	0	0	0	0	0	0
1	0	0	1	0	0	0	1	0	0	0	0	0	0	0	0
1	0	0	1	0	0	0	0	0	1	0	0	0	0	0	0
0	0	0	1	0	0	0	0	0	0	0	0	0	0	0	0
0	0	0	1	1	0	1	0	0	0	0	0	0	0	0	0
0	0	0	1	1	0	1	0	0	0	0	0	0	0	0	0
0	1	0	1	0	0	0	0	0	0	0	0	0	0	0	0
0	0	1	1	0	0	0	0	0	0	0	0	0	0	0	0
0	0	0	1	1	0	0	0	0	0	0	0	0	0	0	0
1	0	0	1	0	0	0	0	0	0	0	0	0	0	0	0
0	0	0	1	0	0	0	0	1	0	0	0	0	0	0	0
0	0	0	1	0	0	0	1	0	0	0	0	0	0	0	0
0	0	0	1	0	0	0	0	0	1	0	0	0	0	0	0
0	0	0	1	0	0	0	0	0	0	1	0	0	0	0	0
0	0	0	1	0	0	0	0	0	0	0	0	1	0	0	0
0	1	0	1	0	0	0	0	1	0	0	0	0	0	0	0
0	1	0	1	0	0	0	1	0	0	0	0	0	0	0	0
0	1	0	1	0	0	0	0	0	1	0	0	0	0	0	0
0	1	0	1	0	0	0	0	0	0	1	0	0	0	0	0
0	1	0	1	0	0	0	0	0	0	0	0	1	0	0	0
0	0	1	1	0	0	0	0	1	0	0	0	0	0	0	0
0	0	1	1	0	0	0	1	0	0	0	0	0	0	0	0
0	0	1	1	0	0	0	0	0	1	0	0	0	0	0	0
0	0	1	1	0	0	0	0	0	0	1	0	0	0	0	0
0	0	1	1	0	0	0	0	0	0	0	0	1	0	0	0
0	0	0	1	1	0	0	0	1	0	0	0	0	0	0	0
0	0	0	1	1	0	0	1	0	0	0	0	0	0	0	0
0	0	0	1	1	0	0	0	0	1	0	0	0	0	0	0
0	0	0	1	1	0	0	0	0	0	1	0	0	0	0	0
0	0	0	1	1	0	0	0	0	0	0	0	1	0	1	0
1	0	0	1	0	0	0	0	1	0	0	0	0	0	0	0
1	0	0	1	0	0	0	1	0	0	0	0	0	0	0	0
1	0	0	1	0	0	0	0	0	1	0	0	0	0	0	0
0	1	0	1	0	0	0	0	0	0	0	0	0	0	0	0
0	0	1	1	0	0	0	0	0	0	0	0	0	0	0	0
0	0	0	1	1	0	0	0	0	0	0	0	0	0	0	0
1	0	0	1	0	0	0	0	0	0	0	0	0	0	0	0
0	0	0	1	0	0	0	0	1	0	0	0	0	0	0	0
0	0	0	1	0	0	0	1	0	0	0	0	0	0	0	0
0	0	0	1	0	0	0	0	0	1	0	0	0	0	0	0
0	0	0	1	0	0	0	0	0	0	1	0	0	0	0	0
0	0	0	1	0	0	0	0	0	0	0	0	1	0	0	0
0	1	0	1	0	0	0	0	1	0	0	0	0	0	0	0
0	1	0	1	0	0	0	1	0	0	0	0	0	0	0	0
0	1	0	1	0	0	0	0	0	1	0	0	0	0	0	0
0	1	0	1	0	0	0	0	0	0	1	0	0	0	0	0
0	1	0	1	0	0	0	0	0	0	0	0	1	0	0	0
0	0	1	1	0	0	0	0	1	0	0	0	0	0	0	0
0	0	1	1	0	0	0	1	0	0	0	0	0	0	0	0
0	0	1	1	0	0	0	0	0	1	0	0	0	0	0	0
0	0	1	1	0	0	0	0	0	0	1	0	0	0	0	0
0	0	1	1	0	0	0	0	0	0	0	0	1	0	0	0
0	0	0	1	1	0	0	0	1	0	0	0	0	0	0	0
0	0	0	1	1	0	0	1	0	0	0	0	0	0	0	0
0	0	0	1	1	0	0	0	0	1	0	0	0	0	0	0
0	0	0	1	1	0	0	0	0	0	1	0	0	0	1	1
0	0	0	1	1	0	0	0	0	0	0	0	1	0	0	0
1	0	0	1	0	0	0	0	1	0	0	0	0	0	0	0
1	0	0	1	0	0	0	1	0	0	0	0	0	0	0	0
1	0	0	1	0	0	0	0	0	1	0	0	0	0	0	0
0	1	0	1	0	0	0	0	0	0	0	0	0	0	0	0
0	0	1	1	0	0	0	0	0	0	0	0	0	0	1	0
0	0	0	1	1	0	0	0	0	0	0	0	0	0	0	0
1	0	0	1	0	0	0	0	0	0	0	0	0	0	0	0
0	0	0	1	0	0	0	0	1	0	0	0	0	0	0	0
0	0	0	1	0	0	0	1	0	0	0	0	0	0	0	0
0	0	0	1	0	0	0	0	0	1	0	0	0	0	0	0
0	0	0	1	0	0	0	0	0	0	1	0	0	0	0	0
0	0	0	1	0	0	0	0	0	0	0	0	1	0	0	0
0	1	0	1	0	0	0	0	1	0	0	0	0	0	0	0
0	1	0	1	0	0	0	1	0	0	0	0	0	0	0	0
0	1	0	1	0	0	0	0	0	1	0	0	0	0	0	0
0	1	0	1	0	0	0	0	0	0	1	0	0	0	1	0
0	1	0	1	0	0	0	0	0	0	0	0	1	0	0	0
0	0	1	1	0	0	0	0	1	0	0	0	0	0	0	0
0	0	1	1	0	0	0	1	0	0	0	0	0	0	0	0
0	0	1	1	0	0	0	0	0	1	0	0	0	0	0	0
0	0	1	1	0	0	0	0	0	0	1	0	0	0	0	0
0	0	1	1	0	0	0	0	0	0	0	0	1	0	0	0
0	0	0	1	1	0	0	0	1	0	0	0	0	0	1	1
0	0	0	1	1	0	0	1	0	0	0	0	0	0	1	0
0	0	0	1	1	0	0	0	0	1	0	0	0	0	0	0
0	0	0	1	1	0	0	0	0	0	1	0	0	0	1	0
0	0	0	1	1	0	0	0	0	0	0	0	1	0	1	0
1	0	0	1	0	0	0	0	1	0	0	0	0	0	0	0
1	0	0	1	0	0	0	1	0	0	0	0	0	0	0	0
1	0	0	1	0	0	0	0	0	1	0	0	0	0	0	0
0	0	0	1	0	0	0	0	0	0	0	0	0	0	0	0
0	0	0	1	1	0	1	0	0	0	0	0	0	0	0	0
0	0	0	1	1	0	1	0	0	0	0	0	0	0	0	0
0	1	0	1	0	0	0	0	0	0	0	0	0	0	0	0
0	0	1	1	0	0	0	0	0	0	0	0	0	0	0	0
0	0	0	1	1	0	0	0	0	0	0	0	0	0	0	0
1	0	0	1	0	0	0	0	0	0	0	0	0	0	0	0
0	0	0	1	0	0	0	0	1	0	0	0	0	0	0	0
0	0	0	1	0	0	0	1	0	0	0	0	0	0	0	0
0	0	0	1	0	0	0	0	0	1	0	0	0	0	0	0
0	0	0	1	0	0	0	0	0	0	1	0	0	0	0	0
0	0	0	1	0	0	0	0	0	0	0	0	1	0	0	0
0	1	0	1	0	0	0	0	1	0	0	0	0	0	0	0
0	1	0	1	0	0	0	1	0	0	0	0	0	0	0	0
0	1	0	1	0	0	0	0	0	1	0	0	0	0	1	1
0	1	0	1	0	0	0	0	0	0	1	0	0	0	0	0
0	1	0	1	0	0	0	0	0	0	0	0	1	0	0	0
0	0	1	1	0	0	0	0	1	0	0	0	0	0	0	0
0	0	1	1	0	0	0	1	0	0	0	0	0	0	0	0
0	0	1	1	0	0	0	0	0	1	0	0	0	0	0	0
0	0	1	1	0	0	0	0	0	0	1	0	0	0	0	0
0	0	1	1	0	0	0	0	0	0	0	0	1	0	0	0
0	0	0	1	1	0	0	0	1	0	0	0	0	0	0	0
0	0	0	1	1	0	0	1	0	0	0	0	0	0	0	0
0	0	0	1	1	0	0	0	0	1	0	0	0	0	0	0
0	0	0	1	1	0	0	0	0	0	1	0	0	0	0	0
0	0	0	1	1	0	0	0	0	0	0	0	1	0	0	0
1	0	0	1	0	0	0	0	1	0	0	0	0	0	0	0
1	0	0	1	0	0	0	1	0	0	0	0	0	0	0	0
1	0	0	1	0	0	0	0	0	1	0	0	0	0	0	0
0	0	0	1	0	0	0	0	0	0	0	0	0	0	0	0
0	0	0	1	1	0	1	0	0	0	0	0	0	0	0	0
0	0	0	1	1	0	1	0	0	0	0	0	0	0	0	0
0	0	0	1	1	0	0	1	0	0	0	0	0	0	0	0
0	0	0	1	1	0	0	0	1	0	0	0	0	0	0	0
0	0	0	1	1	0	0	0	0	0	1	0	0	0	0	0
0	0	0	1	1	0	1	0	0	0	0	0	0	0	0	0
0	0	0	1	1	0	0	0	0	0	0	0	1	0	0	0
0	0	0	1	1	0	1	0	0	0	0	0	1	0	0	0
0	0	0	1	1	0	0	0	0	0	1	0	1	0	0	0
0	0	0	1	1	0	0	1	0	0	0	0	1	0	0	0
0	0	1	1	1	0	0	0	0	0	0	0	0	0	0	0
0	1	0	1	1	0	0	0	0	0	0	0	0	0	1	1
0	0	1	1	1	0	0	0	0	0	0	0	1	0	1	0
0	0	1	1	1	0	0	0	0	0	1	0	0	0	0	0
0	0	1	1	1	0	1	0	0	0	0	0	0	0	0	0
0	0	1	1	0	0	0	1	0	0	0	0	0	0	0	0
0	0	1	1	0	0	0	0	1	0	0	0	0	0	0	0
0	0	1	1	0	0	0	0	0	0	1	0	0	0	0	0
0	0	1	1	0	0	0	0	0	0	0	0	1	0	0	0
0	0	1	1	0	0	1	0	0	0	0	0	0	0	0	0
0	0	1	1	0	0	0	0	1	0	1	0	0	0	0	0
0	0	1	1	0	0	0	0	0	0	1	0	1	0	0	0
0	0	1	1	0	0	0	0	1	0	0	0	1	0	0	0
0	1	1	1	0	0	0	0	0	0	0	0	0	0	0	0
0	1	0	1	0	0	0	1	0	0	0	0	0	0	0	0
0	1	0	1	0	0	0	0	0	0	0	0	1	0	0	0
0	1	0	1	0	0	0	0	1	0	0	0	0	0	0	0
0	1	0	1	0	0	0	0	1	0	0	0	1	0	0	0
0	1	0	1	0	0	0	0	0	1	0	0	1	0	0	0
0	1	0	1	0	0	0	0	0	0	0	0	0	0	0	0
0	0	0	1	1	0	0	1	0	0	0	0	0	0	0	1
0	0	0	1	1	0	0	0	1	0	0	0	0	0	0	1
0	0	0	1	1	0	0	0	0	0	1	0	0	0	0	1
0	0	0	1	1	0	1	0	0	0	0	0	0	0	0	0
0	0	0	1	1	0	0	0	0	0	0	0	1	0	0	0
0	0	0	1	1	0	1	0	0	0	0	0	1	0	0	0
0	0	0	1	1	0	0	0	0	0	1	0	1	0	0	0
0	0	0	1	1	0	0	1	0	0	0	0	1	0	0	0
0	0	1	1	1	0	0	0	0	0	0	0	0	0	0	0
0	1	0	1	1	0	0	0	0	0	0	0	0	0	0	0
0	0	1	1	1	0	0	0	0	0	0	0	1	0	1	1
0	0	1	1	1	0	0	0	0	0	1	0	0	0	0	1
0	0	1	1	1	0	1	0	0	0	0	0	0	0	0	1
0	0	1	1	0	0	0	1	0	0	0	0	0	0	0	0
0	0	1	1	0	0	0	0	1	0	0	0	0	0	0	0
0	0	1	1	0	0	0	0	0	0	1	0	0	0	1	0
0	0	1	1	0	0	0	0	0	0	0	0	1	0	0	0
0	0	1	1	0	0	1	0	0	0	0	0	0	0	0	0
0	0	1	1	0	0	0	0	1	0	1	0	0	0	1	0
0	0	1	1	0	0	0	0	0	0	1	0	1	0	0	0
0	0	1	1	0	0	0	0	1	0	0	0	1	0	1	1
0	1	1	1	0	0	0	0	0	0	0	0	0	0	0	0
0	1	0	1	0	0	0	1	0	0	0	0	0	0	0	0
0	1	0	1	0	0	0	0	0	0	0	0	1	0	0	0
0	1	0	1	0	0	0	0	1	0	0	0	0	0	0	0
0	1	0	1	0	0	0	0	1	0	0	0	1	0	0	0
0	1	0	1	0	0	0	0	0	1	0	0	1	0	0	0
0	1	0	1	0	0	0	0	0	0	0	0	0	0	0	0
0	0	0	1	1	0	0	1	0	0	0	0	0	0	0	0
0	0	0	1	1	0	0	0	1	0	0	0	0	0	0	0
0	0	0	1	1	0	0	0	0	0	1	0	0	0	0	0
0	0	0	1	1	0	1	0	0	0	0	0	0	0	0	0
0	0	0	1	1	0	0	0	0	0	0	0	1	0	0	0
0	0	0	1	1	0	1	0	0	0	0	0	1	0	0	0
0	0	0	1	1	0	0	0	0	0	1	0	1	0	0	0
0	0	0	1	1	0	0	1	0	0	0	0	1	0	0	0
0	0	1	1	1	0	0	0	0	0	0	0	0	0	1	0
0	1	0	1	1	0	0	0	0	0	0	0	0	0	0	1
0	0	1	1	1	0	0	0	0	0	0	0	1	0	0	0
0	0	1	1	1	0	0	0	0	0	1	0	0	0	0	0
0	0	1	1	1	0	1	0	0	0	0	0	0	0	0	0
0	0	1	1	0	0	0	1	0	0	0	0	0	0	1	0
0	0	1	1	0	0	0	0	1	0	0	0	0	0	0	0
0	0	1	1	0	0	0	0	0	0	1	0	0	0	0	0
0	0	1	1	0	0	0	0	0	0	0	0	1	0	0	0
0	0	1	1	0	0	1	0	0	0	0	0	0	0	0	0
0	0	1	1	0	0	0	0	1	0	1	0	0	0	1	0
0	0	1	1	0	0	0	0	0	0	1	0	1	0	0	0
0	0	1	1	0	0	0	0	1	0	0	0	1	0	0	0
0	1	1	1	0	0	0	0	0	0	0	0	0	0	0	0
0	1	0	1	0	0	0	1	0	0	0	0	0	0	0	0
0	1	0	1	0	0	0	0	0	0	0	0	1	0	0	0
0	1	0	1	0	0	0	0	1	0	0	0	0	0	0	0
0	1	0	1	0	0	0	0	1	0	0	0	1	0	0	0
0	1	0	1	0	0	0	0	0	1	0	0	1	0	0	0
0	1	0	1	0	0	0	0	0	0	0	0	0	0	0	0
0	0	0	1	1	0	0	1	0	0	0	0	0	0	1	1
0	0	0	1	1	0	0	0	1	0	0	0	0	0	1	1
0	0	0	1	1	0	0	0	0	0	1	0	0	0	0	1
0	0	0	1	1	0	1	0	0	0	0	0	0	0	0	0
0	0	0	1	1	0	0	0	0	0	0	0	1	0	0	0
0	0	0	1	1	0	1	0	0	0	0	0	1	0	0	0
0	0	0	1	1	0	0	0	0	0	1	0	1	0	0	0
0	0	0	1	1	0	0	1	0	0	0	0	1	0	0	0
0	0	1	1	1	0	0	0	0	0	0	0	0	0	0	0
0	1	0	1	1	0	0	0	0	0	0	0	0	0	0	0
0	0	1	1	1	0	0	0	0	0	0	0	1	0	0	1
0	0	1	1	1	0	0	0	0	0	1	0	0	0	1	1
0	0	1	1	1	0	1	0	0	0	0	0	0	0	0	1
0	0	1	1	0	0	0	1	0	0	0	0	0	0	0	0
0	0	1	1	0	0	0	0	1	0	0	0	0	0	0	0
0	0	1	1	0	0	0	0	0	0	1	0	0	0	0	0
0	0	1	1	0	0	0	0	0	0	0	0	1	0	0	0
0	0	1	1	0	0	1	0	0	0	0	0	0	0	0	0
0	0	1	1	0	0	0	0	1	0	1	0	0	0	0	0
0	0	1	1	0	0	0	0	0	0	1	0	1	0	0	0
0	0	1	1	0	0	0	0	1	0	0	0	1	0	0	1
0	1	1	1	0	0	0	0	0	0	0	0	0	0	0	0
0	1	0	1	0	0	0	1	0	0	0	0	0	0	1	0
0	1	0	1	0	0	0	0	0	0	0	0	1	0	0	0
0	1	0	1	0	0	0	0	1	0	0	0	0	0	0	0
0	1	0	1	0	0	0	0	1	0	0	0	1	0	0	0
0	1	0	1	0	0	0	0	0	1	0	0	1	0	0	0
0	1	0	1	0	0	0	0	0	0	0	0	0	0	0	0
